# Supplementary material for: RNA-Seq Analysis of Cisplatin and the Monofunctional Platinum(II) Complex, Phenanthriplatin, in A549 Non-Small Cell Lung Cancer and IMR90 Lung Fibroblast Cell Lines
Source: PubMed Central journal article supplement (PMC7764052; doi:10.3390/cells9122637), 2020-12-08
Supplement: cells-09-02637-s001.pdf [file cells-09-02637-s001.pdf]

**Supplementary Table 1: Sample and Barcode Information**

| Sample_ID                       | I7 Index ID | I7 Index |
|---------------------------------|-------------|----------|
| MS_01_A549_untreated_vehicle_1  | BC001       | CGCTACAT |
| MS_02_A549_untreated_vehicle_2  | BC002       | AATCCAGC |
| MS_03_A549_phenanthriplatin_1   | BC003       | CGTCTAAC |
| MS_04_A549_phenanthriplatin_2   | BC004       | AACTCGGA |
| MS_06_A549_cisplatin_1          | BC006       | ACAACAGC |
| MS_07_IMR90_untreated_vehicle_1 | BC007       | ATGACAGG |
| MS_08_IMR90_untreated_vehicle_2 | BC008       | GCACACAA |
| MS_09_IMR90_phenanthriplatin_1  | BC009       | CTCCTAGT |
| MS_10_IMR90_phenanthriplatin_2  | BC010       | TCTTCGAC |
| MS_12_IMR90_cisplatin_1         | BC012       | ACTCCTAC |
| MS_13_A549_untreated_vehicle_3  | BC013       | CTTCCTTC |
| MS_14_A549_phenanthriplatin_3   | BC014       | ACCATCCT |
| MS_17_A549_cisplatin_2          | BC017       | GTACACCT |
| MS_18_A549_cisplatin_3          | BC018       | ACGAGAAC |
| MS_19_IMR90_untreated_vehicle_3 | BC019       | CGACCTAA |
| MS_20_IMR90_phenanthriplatin_3  | BC020       | TACATCGG |
| MS_23_IMR90_cisplatin_2         | BC023       | TCTAGGAG |
| MS_24_IMR90_cisplatin_3         | BC024       | CTCGAACA |

**Supplementary Table 2: Summary of initial sequence analysis**

| File                                      | Input Reads | Aligned Reads | Alignment Rate |
|-------------------------------------------|-------------|---------------|----------------|
| MS_01_A549_untreated_vehicle_1-288005557  | 29,624,735  | 29,443,904    | 99.38%         |
| MS_02_A549_untreated_vehicle_2-288012171  | 24,354,246  | 24,195,940    | 99.34%         |
| MS_13_A549_untreated_vehicle_3-288019954  | 27,373,112  | 27,130,180    | 99.11%         |
| MS_03_A549_phenanthriplatin_1-288021973   | 27,068,350  | 26,848,365    | 99.18%         |
| MS_04_A549_phenanthriplatin_2-288029943   | 26,167,494  | 25,935,865    | 99.11%         |
| MS_14_A549_phenanthriplatin_3-288021975   | 25,804,338  | 25,557,744    | 99.04%         |
| MS_06_A549_cisplatin_1-288029944          | 25,993,579  | 25,803,612    | 99.26%         |
| MS_17_A549_cisplatin_2-288026940          | 26,612,411  | 26,457,257    | 99.41%         |
| MS_18_A549_cisplatin_3-288010192          | 28,711,302  | 28,530,222    | 99.36%         |
| MS_07_IMR90_untreated_vehicle_1-288020948 | 30,233,132  | 30,061,035    | 99.43%         |
| MS_08_IMR90_untreated_vehicle_2-288010190 | 28,535,621  | 28,343,931    | 99.32%         |
| MS_19_IMR90_untreated_vehicle_3-288013976 | 29,342,292  | 29,157,183    | 99.36%         |

|                                          |            |            |        |
|------------------------------------------|------------|------------|--------|
| MS_09_IMR90_phenanthriplatin_1-288019952 | 25,186,144 | 25,019,000 | 99.33% |
| MS_10_IMR90_phenanthriplatin_2-288018959 | 25,835,999 | 25,664,633 | 99.33% |
| MS_20_IMR90_phenanthriplatin_3-288024879 | 27,500,038 | 27,326,280 | 99.36% |
| MS_12_IMR90_cisplatin_1-288013974        | 27,263,332 | 27,088,420 | 99.35% |
| MS_23_IMR90_cisplatin_2-288026945        | 25,764,318 | 25,618,335 | 99.43% |
| MS_24_IMR90_cisplatin_3-288022955        | 27,726,156 | 27,533,265 | 99.3%  |

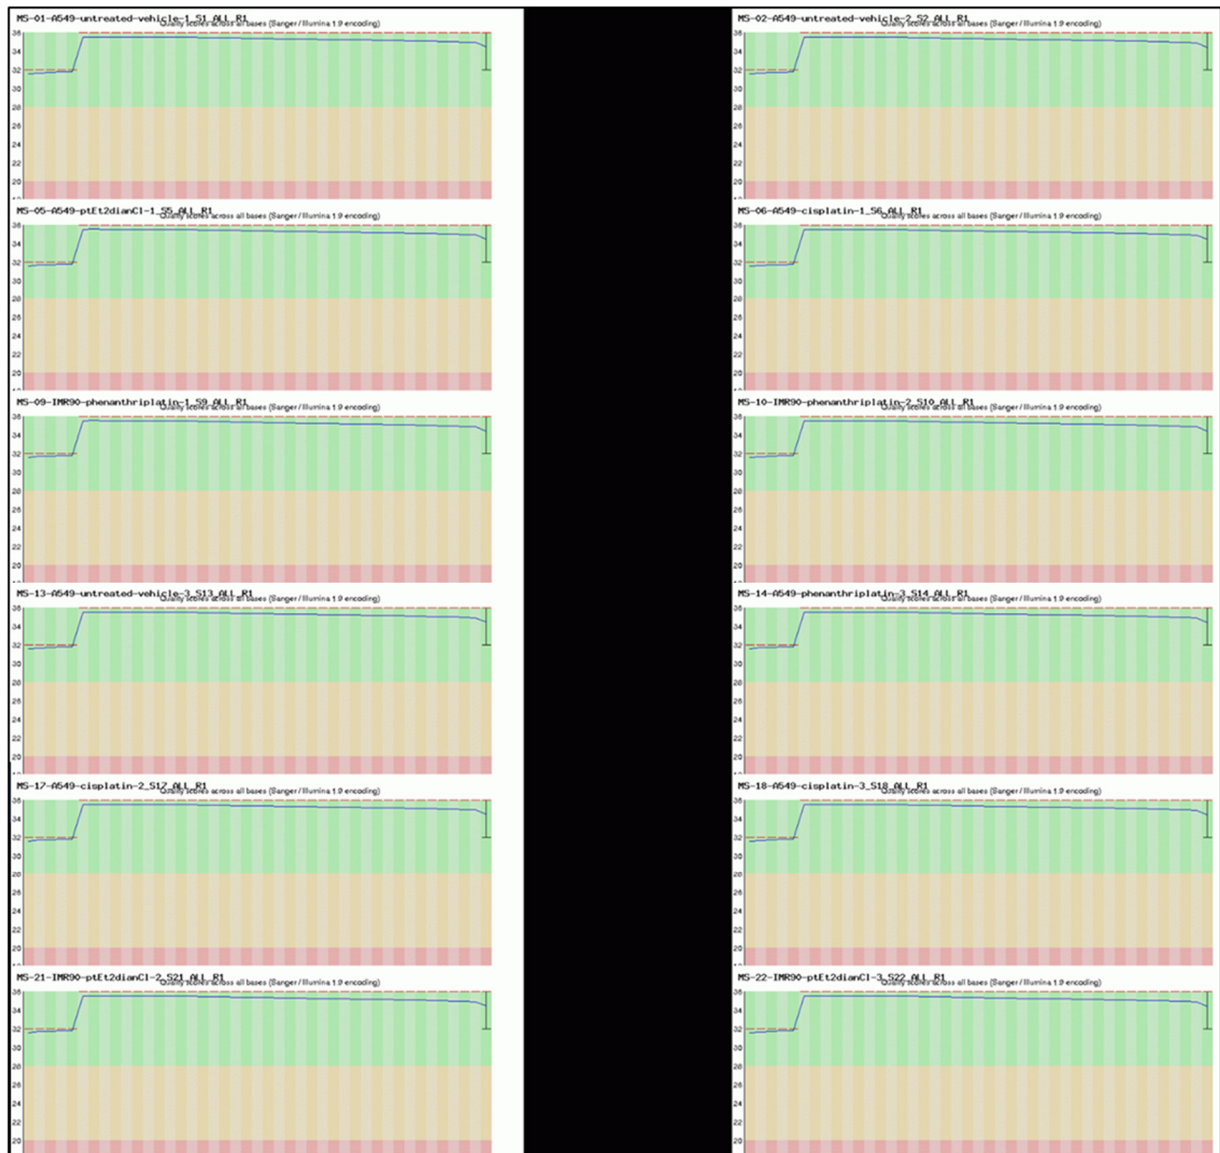

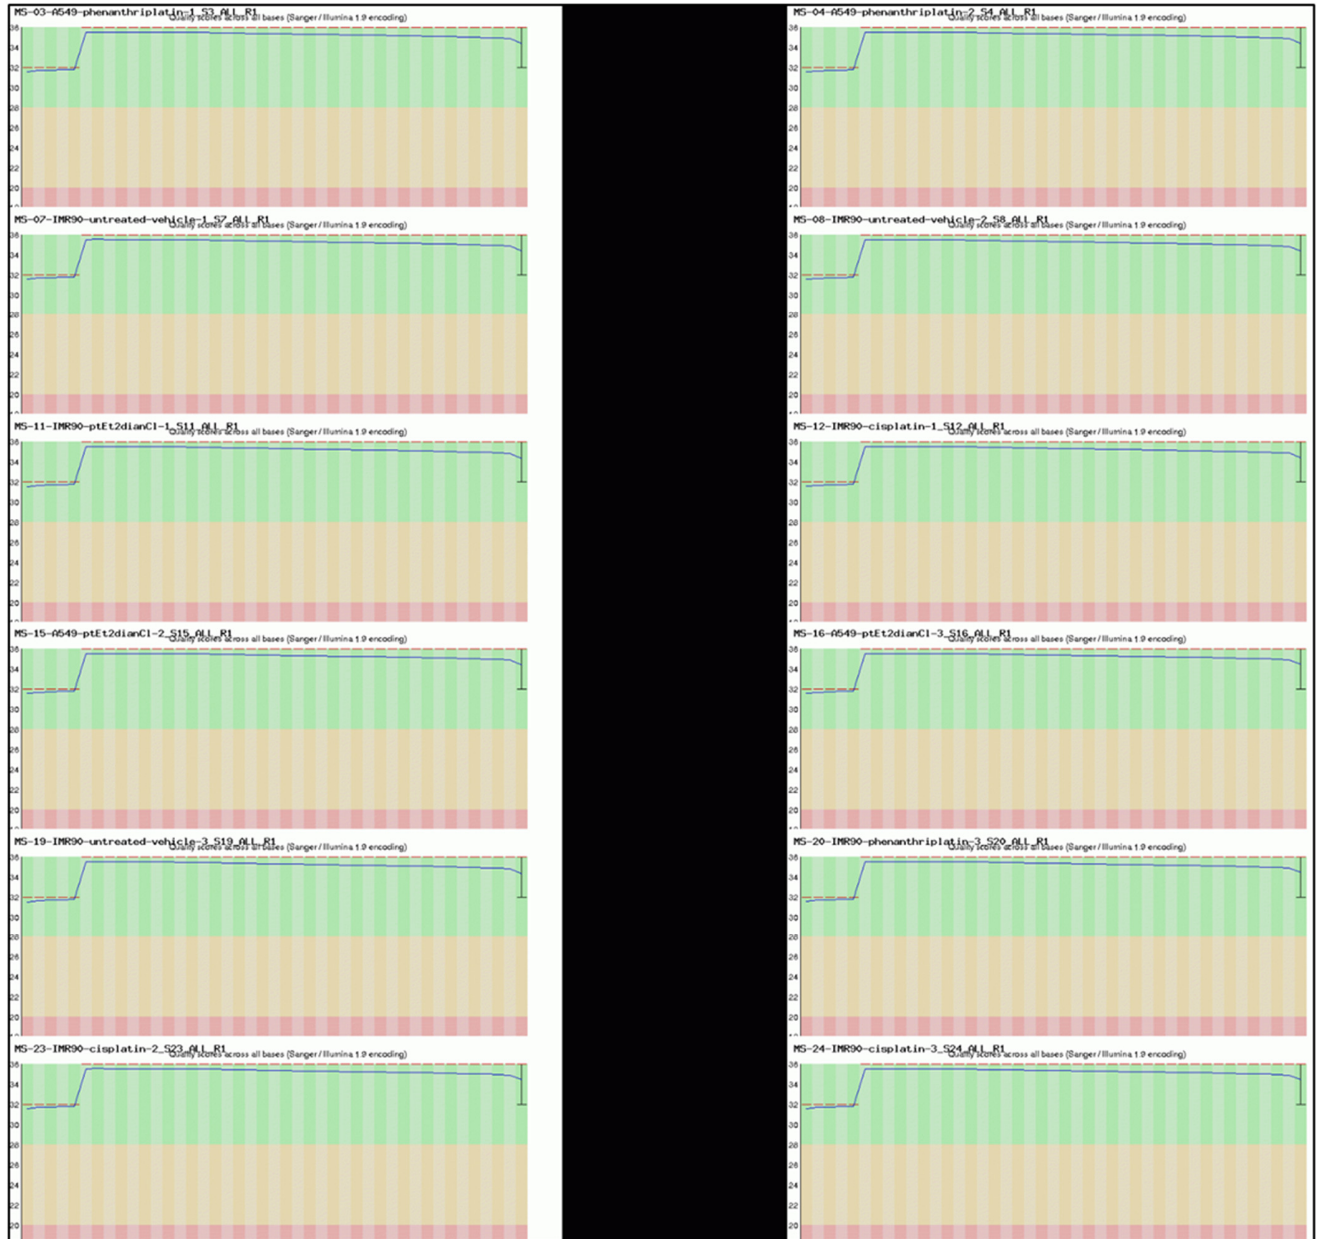

**Supplementary Figure 1:** Quality scores for raw sequences. The X-axis represents each base position along the reads. The Y-axis represents Phred scores, a measure of the accuracy in base calling. A Phred score of 30 indicates 99.9% accuracy in base calling. Phred scores above 28 (green) are considered very good quality. Scores between 20 and 28 (orange) are considered reasonable quality. Scores below 20 (red) are considered poor quality. The yellow box represents the inter-quartile range (25-75%). The lower and upper whiskers represent the 10th and 90th percentiles respectively.

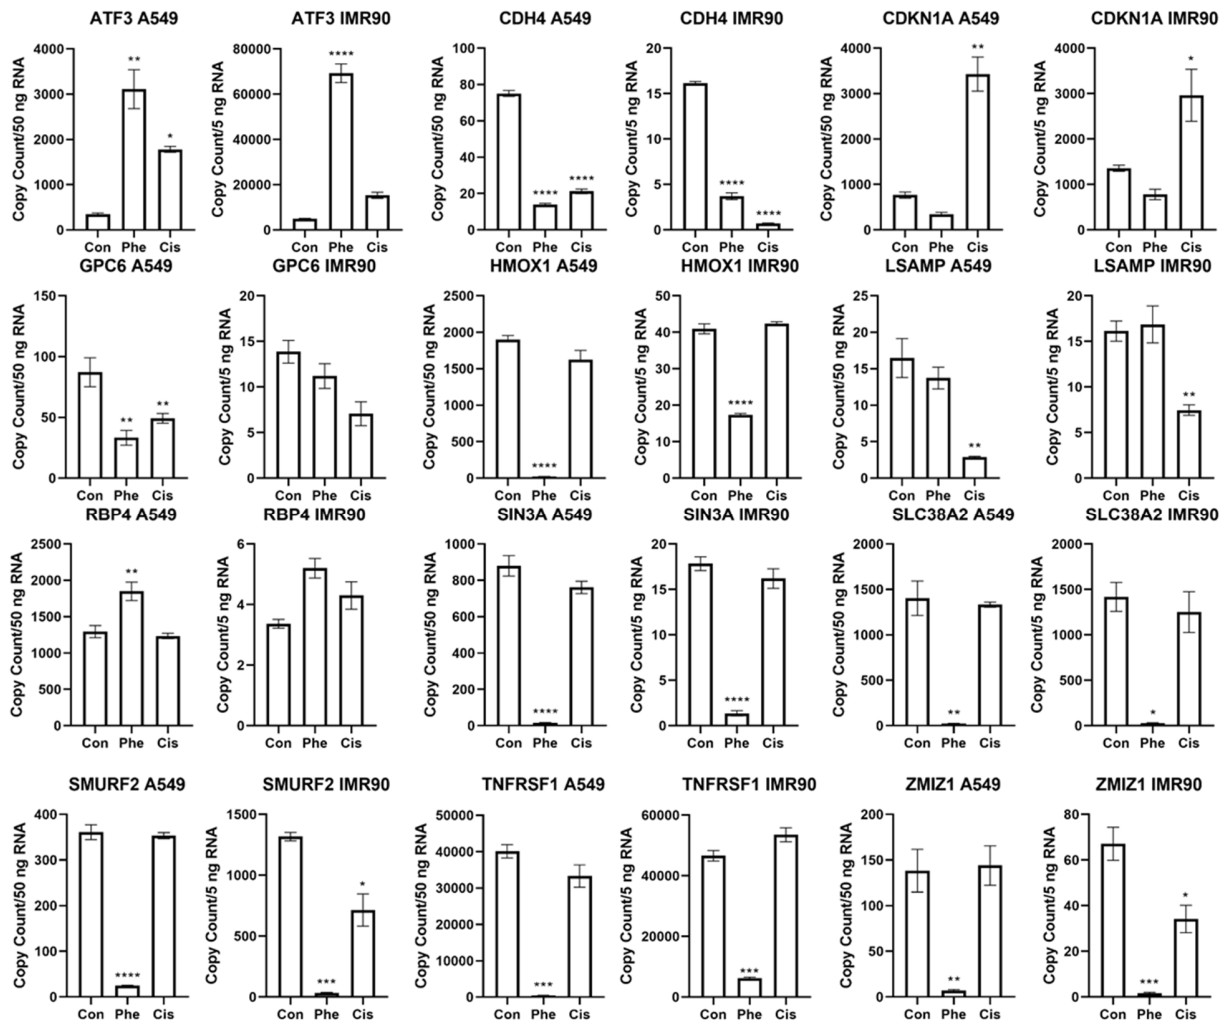

**Supplementary Figure 2:** Additional examples of next generation sequencing validation using droplet digital polymerase chain (ddPCR) reaction in A549 and IMR90 cells. Mean expression of the experimental genes, ATF3, CDH4, CDKN1A, GPC6, HMOX1, LSAMP, RBP4, SIN3A, SLC38A2, SMURF2, TNFRSF1, ZMIZ1, as measured by ddPCR. Graph labelling: Con = control; Phe = phenanthriplatin; Cis = cisplatin. Y-axis represents copy count for 50 ng RNA sample. Mean ( $\pm$  SEM); N = 3;  $p < 0.05$ ; “\*” =  $p < 0.05$ ; “\*\*” =  $p < 0.01$ ; “\*\*\*” =  $p < 0.001$ ; “\*\*\*\*” =  $p < 0.0001$ .
